# Supplementary material
Source: PubMed Central journal article supplement (PMC2887061)
Supplement: mcq002_1.pdf [file mcq002_1.pdf]

## SUPPLEMENTARY DATA

TABLE S1. Primers used for quantitative RT-PCR

| Primer name                  | Sequence                         |
|------------------------------|----------------------------------|
| <i>IDEF1 B3</i> forward      | 5'-ATGGACGACATGGTGCTCC-3'        |
| <i>IDEF1 B3</i> reverse      | 5'-CTAGGGATTTGTTGTCTGCT-3'       |
| <i>OsIRO2</i> forward        | 5'-CACCAGCACCACCAACTGCAAACCAG-3' |
| <i>OsIRO2</i> reverse        | 5'-GCTTTGTTCCCTGACGACTTTCTCC-3'  |
| <i>OsYSL2</i> forward        | 5'-TCTGCTGGCTTCTTTGCATTTTCTG-3'  |
| <i>OsYSL2</i> reverse        | 5'-ACCATGTGCGAACTCAGCATCCAGGA-3' |
| <i>OsNAS2</i> forward        | 5'-TGAGTGCGTGCATAGTAATCCTGGC-3'  |
| <i>OsNAS2</i> reverse        | 5'-CAGACGGTCACAAACACCTCTTGC-3'   |
| <i>OsYSL15</i> forward       | 5'-CACCCCTGGTGAAGCAGCTGGTGCTC-3' |
| <i>OsYSL15</i> reverse       | 5'-CGGCCATCGCCGTCGGCAGCGGCAC-3'  |
| <i>IDEF2 non-NAC</i> forward | 5'-CACCCAGTCCTGTAATTGAGGGGC-3'   |
| <i>IDEF2 non-NAC</i> reverse | 5'-GTGGGAACTGCATGCTGGGT-3'       |
| <i>AK065090</i> forward      | 5'-AGATCCGCCGCAACTGCTTC-3'       |
| <i>AK065090</i> reverse      | 5'-CTTATTAACGCGCGCACGGC-3'       |
| <i>AK099523</i> forward      | 5'-ACCCGCAAAGAAGGGTGCTA-3'       |
| <i>AK099523</i> reverse      | 5'-GCCTGGAATACCGTAACAATACTG-3'   |
| <i>AK103890</i> forward      | 5'-GTGGCCACAGCAAGGAGCTG-3'       |
| <i>AK103890</i> reverse      | 5'-CATTGAGAGTGATGATAGAGGG-3'     |
| <i>OsRAc1</i> forward        | 5'-ACACCGGTGTCATGGTCGG-3'        |
| <i>OsRAc1</i> reverse        | 5'-ACACGGAGCTCGTTGTAGAA-3'       |
